# Supplementary material for: Development of enhancer-trapping and -detection vectors mediated by the Tol2 transposon in zebrafish
Source: PeerJ. 2019 Apr 30;7:e6862. doi: 10.7717/peerj.6862 (PMC6499061; doi:10.7717/peerj.6862)
Supplement: Supplemental Information 1 — Positive rate of embryos injected with different vectors under different conditions [file peerj-07-6862-s001.xlsx]

## Sheet: Sheet1
raw data:
	The rate of mCherry positivity (Number of embryos expressing mCherry reporter genes/Total number of embryos injected)
	12hpf（Tol2 mRNA+）	72hpf（Tol2 mRNA+）	12hpf（Tol2 mRNA-）	72hpf（Tol2 mRNA-）
pTol2-Myc-mCherry	75/300	10/301	5/320	0/304
pTol2-Oct4-mCherry	25/304	4/300	0/311	0/304
pTol2-Krt4-mCherry	194/302	202/301	133/301	22/308
pTol2-Gata-mCherry	136/305	71/307	0/302	0/300
	The rate of mCherry positivity
pTol2-Krt4-mCherry	202/302
pEDV-Krt4	166/301
pTol2-Gata-mCherry	71/308
pEDV-Gata	15/301
	The rate of mCherry positivity
pEDV-Z48-Gata	143/308
pEDV-CNS1-Gata	133/300
pEDV-Hand2-Gata	0/303
pEDV-hs769-Gata	0/310
	The rate of GFP positivity
pEDV-Z48-Beta-globin	111/303
pEDV-Hand2-Beta-globin	57/306
pEDV-hs769-Beta-globin	0/303
pEDV-CNS1-Beta-globin	95/320
pEDV-Beta-globin	8/315
